# Supplementary material
Source: HighWire-hosted journal article supplement (https://bjsm.bmj.com/content/55/3/163)
Supplement: inline-supplementary-material-1 [file inline-supplementary-material-1.xlsx]

## Sheet: Sheet1
Supplemental Table 1. Injury Characteristics Categories
Injury Location
1. Face
2. Head
3. Neck/Cervical Spine
4. Thoracic Spine/Upper Back
5. Chest
6. Sternum/Ribs
7. Lumbar Spine/Lower Back
8. Abdomen
9. Pelvis/Sacrum/Buttock
10. Shoulder/Clavicle
11. Upper Arm
12. Elbow
13. Forearm
14. Wrist
15. Hand/Finger
16. Hip/Groin
17. Thigh
18. Knee
19. Lower Leg
20. Achilles Tendon
21. Ankle
22. Foot/Toe
Injury Type
1. Concussion (regardless of loss of consciousness)
2. Fracture (traumatic)
3. Stress Fracture (overuse)
4. Other Bone Injuries
5. Dislocation/Subluxation
6. Tendon Rupture
7. Ligament Rupture
8. Ligament Sprain
9. Lesion of Meniscus or Cartilage
10. Muscle Strain/Rupture/Tear
11. Contusion/Hematoma/Bruise
12. Tendinopathy
13. Arthritis/Synovitis/Bursitis
14. Laceration/Abrasion/Skin Lesion
15. Dental Injury
16. Nerve/Spinal Cord Injury
17. Muscle Cramps/Spasm
18. Hyperextension Injury
19. Impingement
20. Other
Injury Event
1. Vault
2. Floor Exercise
3. High Bar
4. Parallel Bars
5. Rings
6. Pommel Horse
7. No Specific Event*
8. Other**
*No specific event was defined as an injury that occurred during the meet without a specific traumatic event, i.e. an athlete presenting at the end of a day with a complaint
**Other was an injury reported by the athlete during two events
Injury Cause (see Supplemental Table 2 for definitions)
1. Contact with Surface
2. Contact with Apparatus
3. Non-Contact Trauma
4. Overuse/Gradual
5. Contact with Self
Injury Severity (see Supplemental Table 2 for definitions)
1. Full Time Loss
2. Partial Time Loss
3. No Time Loss
Competition Versus Training
1. Competition
2. Training
